1 **Nanostructure of the desmosomal plaque**

2 Irina Iachina<sup>1,2</sup> Helle Gam-Hadberg<sup>1</sup>, and Jonathan R. Brewer<sup>1</sup>

3 <sup>1</sup>Department of Biochemistry and Molecular Biology, University of Southern Denmark, Odense,  
4 Denmark

5 <sup>2</sup>Mads Clausen Institute, SDU NanoSYD, University of Southern Denmark, Soenderborg,  
6 Denmark

7 Article type: Original article

8 **Title:** Nanostructure of the desmosomal plaque

9 **Key words:** Desmoplakin, Desmosome, Desmosomal structure, Desmosomal size, Tight  
10 junctions, STED microscopy

11 Corresponding author contact information:

12 Jonathan R. Brewer

13 Campusvej 55

14 5223 Odense M

15 Denmark

16 E-mail: [Brewer@bmb.sdu.dk](mailto:Brewer@bmb.sdu.dk)

17 Phone: +45 60692772

18 **Abstract**

19 Desmosomes are considered one of the most important intercellular junctions with respect to  
20 mechanical strength. Therefore, their spatial distribution and structure is of interest with respect to  
21 understanding both healthy and diseased tissue. Previous studies have imaged desmosomes in tissue  
22 slices using transmission electron microscopy, or low-resolution confocal images, but both these  
23 techniques lack the ability to resolve the 3-dimensional structure of the desmosomes. In this work it  
24 was possible to determine the 3D-nanostructure of single desmosomal complexes in both mouse and  
25 human epidermis, by 3D stimulated emission depletion (STED) microscopy. STED images of  
26 desmoplakin and the desmosomal cadherin, desmoglein revealed that desmosomes form ring-like

27 structures, distributed over the cell surface, with diameters of around 1  $\mu\text{m}$ . STED images of the tight  
28 junction plaque protein ZO1 also displayed ring formations, suggesting a common structure for  
29 intercellular junctions.

30 Measurements of the desmosomal plaque protein, desmoplakin showed an increased intercellular  
31 plaque distance during the stratum basale ( $0.23 \pm 0.027 \mu\text{m}$ ) to stratum spinosum ( $0.28 \pm 0.039 \mu\text{m}$ )  
32 transition.

33

## 34 Introduction

35 Desmosomes are a class of intercellular junction plaques, together with the other intercellular  
36 junction plaques such as gap junctions and tight junctions [1]. Desmosomes are specialized cell-cell  
37 adhesion complexes that provide tissue with resilience and strength, by linking the keratin intermediate  
38 filament of adjacent cells (Figure 1).

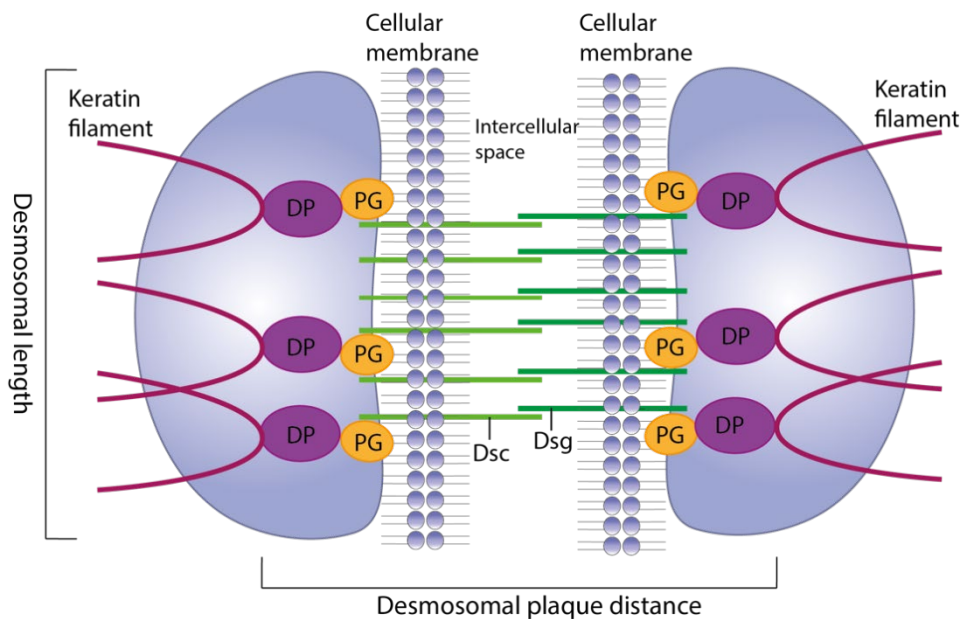

40 *Figure 1: Schematic representation of the desmosomal plaque. In the intracellular space the plaque consists of*  
41 *desmoplakin (DP) and plakoglobins (PG), and the former binds to keratin filaments. The desmosomal cadherins*  
42 *desmocollin (Dsc) and desmoglein (Dsg) anchor the two neighboring cells. Shown is the desmosomal plaque*  
43 *distance as the distance between the C-terminals in DP in two neighboring plaques, as well as the desmosomal*  
44 *length.*

45 Thus, these complexes are often seen in tissues that undergo regular mechanical stress, such  
46 as epithelia, cardiac muscle, bladder, and intestines [2-4]. Disruption of the desmosomes can lead to

47 disturbance of the epidermal homeostasis, a reduction in epidermal barrier function, blistering disease  
48 and overall skin fragility due to decreased intercellular attachment [5-7]. Their spatial distribution and  
49 structure are therefore of great interest both for understanding healthy and diseased tissue.

50           Desmosomes were first discovered on the surface of epidermal cells by Schrön in 1863[8]  
51 who interpreted them as pores in the cellular membrane but were later acknowledged as an intercellular  
52 junction, bridging the intercellular space, by Bizzozero in 1870 [9]. In 1958 Odland[10] reported the  
53 desmosomes to be disc-shaped, and there has since been a general agreement on the desmosomal  
54 structure. However, the reported diameter and width of desmosomes has varied greatly and early  
55 confusion identifying the various intercellular junctions has made the understanding of the desmosomal  
56 structure even more unclear [10-13].

57           Typically, desmosomes have been imaged in tissue slices using Transmission Electron  
58 Microscopy (TEM) [14-16], or low-resolution confocal images [17]. However, both these techniques  
59 lack the ability to resolve the 3-dimensional structure of the desmosomes.

60           Super resolution optical microscopy, such as Stochastic Optical Reconstruction Microscopy  
61 (STORM) [18] and stimulated emission depletion (STED) microscopy, have been used to provide ultra-  
62 structural images of intact tissue, where a resolution down to 40-50 nm was achieved compared to a  
63 resolution of 200 nm using regular fluorescence microscopy [19-22]. Recently, STORM has been used  
64 to resolve the structures of the desmosomes in tissue revealing them as parallel rows of plaques on each  
65 side of the intercellular gap [13, 23, 24]. Interestingly, from literature it is known that gap junctions  
66 form round pores in the cellular membrane of neighboring cells, to establish a route of communication  
67 between neighboring cells [25]. However, the 3-dimensional structure of the desmosomes and tight  
68 junction plaques are as yet not fully elucidated. Therefore, in this study STED and confocal microscopy  
69 were used to investigate and visualize the 3D nanostructure of desmosomes. This was done by imaging  
70 the desmosomal plaque made up by the desmosomal plaque protein, desmoplakin (DP), as well as the  
71 desmosomal cadherin desmoglein (Dsg), and tight junction plaque protein ZO1 in human and mouse  
72 skin samples.

## 73 **Results and Discussion**

74 For STED microscopy the protein desmoplakin (DP) was labeled in both human and mouse  
75 epidermis (Figure 2).

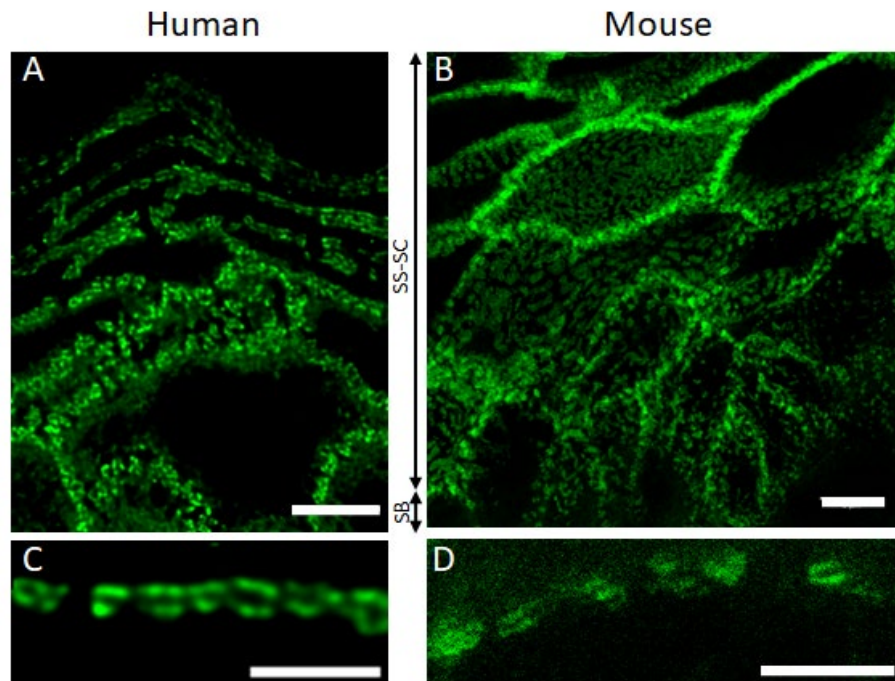

77 *Figure 2: Desmosomal complexes outline the individual keratinocytes. A) and B) STED images of desmoplakin*  
78 *in human and mouse epidermis, respectively. The desmosomal plaques are located along the cellular membrane*  
79 *in a discontinuous pattern, outlining the individual keratinocytes in all the viable layers (SS-SC). The number of*  
80 *complexes decrease when entering the basal layers (SB). Scalebar is 5  $\mu\text{m}$ . C) (Scalebar is 2  $\mu\text{m}$ ) and D) (Scalebar*  
81 *is 1  $\mu\text{m}$ ) STED images of desmoplakin in individual cells in human and mouse epidermis, respectively. One can*  
82 *clearly see the individual plaques laying opposite each other representing the two halves of a desmosome. The*  
83 *dark space between two plaques represents the intercellular proteins and the cellular membranes of the adjacent*  
84 *keratinocytes. Scalebar is 2  $\mu\text{m}$ .*

85 With STED microscopy (Figure 2C and D) a resolution of 60 nm was obtained, enabling the  
86 imaging of sub-resolution protein organizations and the 3-dimensional structure of the individual  
87 desmosomal components.

88 The desmosomes were found to be located along the cellular membrane outlining individual  
89 keratinocytes. As expected, the protein is expressed in all epidermal layers, with a slightly lower  
90 expression in the basal layer. The mirror symmetry of the desmosomal plaques (Figure 2C and D) makes  
91 it easy to identify the individual desmosomes along the cellular membrane. Here the two opposite  
92 plaques show intensive labeling separated by a dark gap, representing the intercellular space where the  
93 desmosomal cadherins, desmocollin (Dsc) and desmoglein (Dsg), as well as the cellular membranes of

94 the neighboring cells reside. Even though the desmosomes are distributed along the cellular membrane  
95 of the entire cell, the individual desmosomes do not appear to have any physical contact.  
96

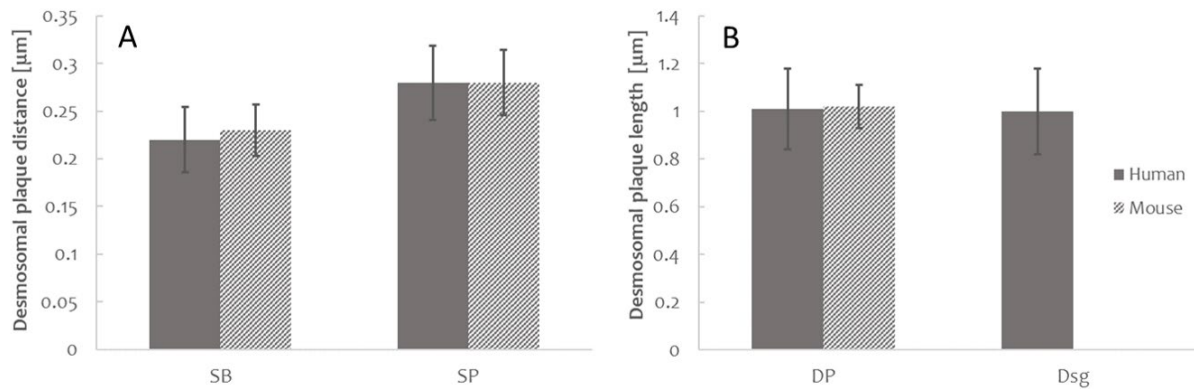

99 *Figure 3: STED enabled exact measurements of the desmosomal dimensions. A) Plaque distances [μm]*  
100 *measured (as shown in Figure 1) in basal (SB) and suprabasal (SP) layers in human and mouse epidermis. The*  
101 *measurements revealed a significantly shorter plaque distance (PD) in basal keratinocytes ( $PD_{human}=0.22 \mu\text{m} \pm$*   
102  *$0.034$ ,  $PD_{mouse} = 0.23 \mu\text{m} \pm 0.027$ ) compared to suprabasal keratinocytes ( $PD_{human}=0.28 \mu\text{m} \pm 0.039$ ,  $PD_{mouse} =$*   
103  *$0.28 \mu\text{m} \pm 0.034$ , in both human and mice. P-values can be seen in Table 1. B) Desmosomal length (diameter)*  
104 *[μm] measured (as shown in Figure 1) in STED images when desmoplakin, DP ( $1 \mu\text{m} \pm 0.17$ ) or desmoglein, Dsg*  
105 *( $1 \mu\text{m} \pm 0.18$ ) was labeled. No significant difference was found in the diameter of the desmosome when measuring*  
106 *the intercellular and extracellular part of the complex ( $P=0.7$ ,  $n_{DP}=37$ ,  $n_{Dsg}=7$ )*

107 Distances between the plaques were measured in both mouse and human epidermis, to  
108 determine desmosomal plaque distance, as illustrated in Figure 1. The plaque distances measured varied  
109 according to epidermal location, thus desmosomes connecting basal (SB) keratinocytes had a tighter  
110 configuration compared to desmosomes located in the suprabasal (SP) layers (Figure 3A). In  
111 desmosomes connecting basal cells the mean plaque distances were measured to be  $0.23 \mu\text{m} (\pm 0.027$   
112  $\mu\text{m SD, n}=26)$  and  $0.22 \mu\text{m} (\pm 0.034 \mu\text{m SD, n}=57)$ , for mouse and human epidermis respectively. In the  
113 suprabasal layers the mean distance measured was significantly wider (P-values can be seen in Table 1),  
114 as it was measured to be  $0.28 \mu\text{m} (\pm 0.034 \mu\text{m SD}_{mouse, n}=26, \pm 0.039 \mu\text{m SD}_{human, n}=57)$  in both mouse  
115 and human epidermis.

116  
117  
118

| <i>Sample</i>                  | <i>Plaque distance</i><br>[ $\mu\text{m}$ ] | <i>Standard deviation</i> [ $\mu\text{m}$ ] | <i>P-value</i> | <i>n</i> |
|--------------------------------|---------------------------------------------|---------------------------------------------|----------------|----------|
| <i>Basal cells, human</i>      | 0.22                                        | $\pm 0.034$                                 |                | 26       |
| <i>Suprabasal cells, human</i> | 0.28                                        | $\pm 0.039$                                 | 7.4E-7         | 26       |
| <i>Basal cells, mouse</i>      | 0.23                                        | $\pm 0.027$                                 |                | 57       |
| <i>Suprabasal cells, mouse</i> | 0.28                                        | $\pm 0.034$                                 | 2.5E-13        | 56       |

119

120 *Table 1: Shows the plaque distances (as shown in Figure 1), standard deviation, P-value and n samples measured*  
 121 *using STED microscopy in basal and suprabasal cells in human and mouse epidermis. The P-values indicate that*  
 122 *there is a statically significant difference between the plaque distances measured in the SB and the SP, both for*  
 123 *mouse and human.*

124

125 The wider configuration in the suprabasal layers could be associated with the maturation of  
 126 the desmosomes during which the desmosomes switch from a  $\text{Ca}^{2+}$ -dependent state to a hyper-adhesive  
 127  $\text{Ca}^{2+}$ -independent state. This was also hypothesized by Stahley et al. [13], who also observed a tighter  
 128 configuration in desmosomes connecting basal keratinocytes compared to desmosomes found in  
 129 suprabasal keratinocytes. During wound healing the hyper-adhesive state is reversed to more plastic  
 130  $\text{Ca}^{2+}$ -dependent state to facilitate cell migration [13, 26]. Hence the wider structure would represent a  
 131 more rigid structure optimized for distributing forces along the keratin intermediate filaments, when  
 132 exposed to mechanical stress.

133 Alternatively, the change in expression of the desmosomal cadherins could be responsible  
 134 for the change in desmosome width. All seven desmosomal cadherins are expressed in the epidermis,  
 135 but as the keratinocytes undergo terminal differentiation, their expression level changes. Dsg2 and 3 as  
 136 well as Dsc2 and 3 are mostly observed in the lower epidermal layers, while Dsg1 shows increased  
 137 expression up through the epidermal layers and Dsc1 has the highest expression in the granular layer  
 138 [27, 28]. Since the desmosomal cadherins are differentially expressed, desmosomes are biochemically,  
 139 and therefore possibly, biologically different throughout the layers[6]. But since the change in  
 140 desmosomal cadherin expression is gradual and the change in desmosomal configuration is prompt when  
 141 entering the spinous layer, the change from a  $\text{Ca}^{2+}$ -dependent state to a  $\text{Ca}^{2+}$ -independent hyper-adhesive  
 142 state seems the most likely explanation.

143 As mentioned earlier, the reported length of the desmosomes has also varied greatly. Here,  
144 the mean length of the desmosomal plaque measured parallel to the cellular membrane as shown in  
145 Figure 1, was approximately 1  $\mu\text{m}$  in both human and mouse epidermis (Figure 3B) and nearly twice  
146 the length previously reported by Odland [10] and Selby [13, 29]. To make sure the diameter of the  
147 plaque represented the diameter of desmosomes in general, the diameter of the intercellular domain,  
148 where desmoglein is present was labeled and measured. The diameter of the intercellular domain did  
149 not vary significantly from the previous measurements (Figure 3B). The differences in the dimensions  
150 reported could partly be related to the sample preparation. An observation supported by Farquhar and  
151 Palade [12] as well as Bates et al [30], the former of which reported that choice of fixative affects the  
152 thickness of the cellular membrane, and the latter reported the use of primary and secondary antibodies  
153 affect the resolution and will increase the apparent size of structures in the tissue. This of course does  
154 not entirely explain the discrepancies and one could imagine that the structure of the desmosomes could  
155 be tissue specific. This in turn raises the question whether the size of the desmosomes is directly related  
156 to strength or rigidity, so tissues that undergo similar levels of mechanical stress have similar sized  
157 desmosomes.

158  
159

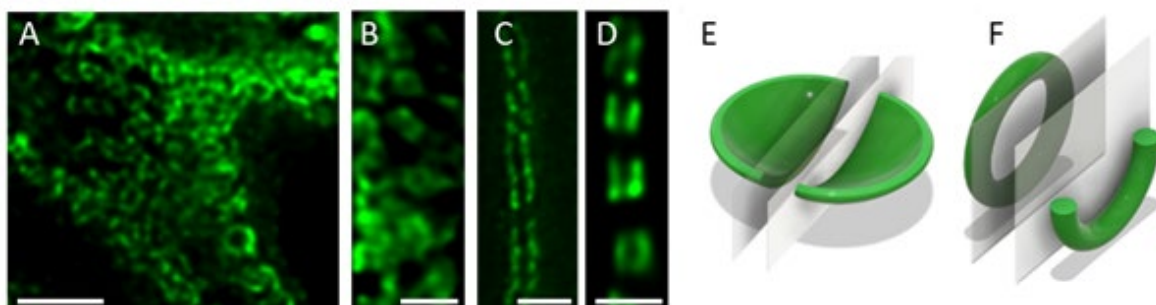

161  
162 *Figure 4: 3D structure of desmosomal plaque. A-D) 3D STED images of keratinocytes with desmoplakin labeling*  
163 *in sliced human epidermis A) xy-plane image at the bottom of a keratinocyte where clear ring structures are seen.*  
164 *Scalebar is 2 $\mu\text{m}$ . B) xz-plane images of the side of a keratinocyte showing the desmosomal nanostructure*  
165 *resembles a ring. Scale bar 1  $\mu\text{m}$ . C and D) B) xy-plane image of desmoplakin seen sliced through the side of the*  
166 *plaque, located at the lateral part of the keratinocyte. The labeling demonstrates the two distinct labeling patterns.*  
167 *In one the labeling continues along the entire length of the plaque (C), while a more discontinuous pattern with*  
168 *either no or very faint labeling in the middle but intense labeling at the ends is shown in (D). Scalebars are 1  $\mu\text{m}$ .*  
169 *E and F) Illustrations of a dissected bowl (E) and ring (F) located at the cytoplasmic part of the cellular membrane.*  
170 *Observed from the middle only the ring-like structure can form the labeling pattern shown in D.*

171 To visualize the 3-dimensional structure of the desmosomes 3D STED z-stacks of the  
172 samples were recorded. STED images taken at the bottom of cells showing the plaques face on clearly  
173 showed ring shaped structures of the desmoplakin (Figure 4A). Further support for this ring structure  
174 comes from xz 3D STED images of the sides of cells which also showed clear ring structures (Figure  
175 4B). Using STED microscopy, it was also possible to image single plaques, sliced through the side,  
176 located at the lateral part of the keratinocyte (Figure 4C and D). These images are typical of how  
177 desmosomes are depicted in optical microscopy in the literature, showing train track like structures of  
178 the plaques [13, 23, 24]. The STED images of the plaques located at the lateral part of the keratinocytes  
179 showed two distinct labeling patterns. The first is a continuous labeling pattern with a uniform intensity  
180 along the length of the entire plaque (Figure 4C). This pattern is consistent with the disc-shaped plaques  
181 reported by Odland (1958). The second pattern shows a non-continuous labeling pattern (figure 4D),  
182 with intensive labeling at the end and with no or faint labeling in the middle. These patterns do not  
183 reflect a disc-shaped structure of the desmosomal plaque. When dissecting a bowl- and ring structure  
184 (figure 4 E and F) only the ring-like structure can create the labeling pattern seen in figure 4D, with  
185 intense labeling at the ends and with no or faint labeling in the middle. This conformation corresponds  
186 to the ring being cut through the middle with only the ends of the ring giving signal to the image.  
187 Therefore, the structures seen in Figure 4C and D also indicate a ring like structure for the desmoplakin.  
188 For similar images in mouse see Figure S1.

189 To exclude the applied antibody as a cause for this labeling pattern an alternative antibody  
190 targeting another epitope in desmoplakin was also used (data not shown). This labeling showed the same  
191 variation in labeling pattern, which excludes the antibodies as the cause of the ring shapes and the two  
192 distinct labeling patterns observed. The hypothesis of a ring structure was further strengthened when  
193 ring-like structures were observed when desmoglein was imaged (Figure 5A).

194



195

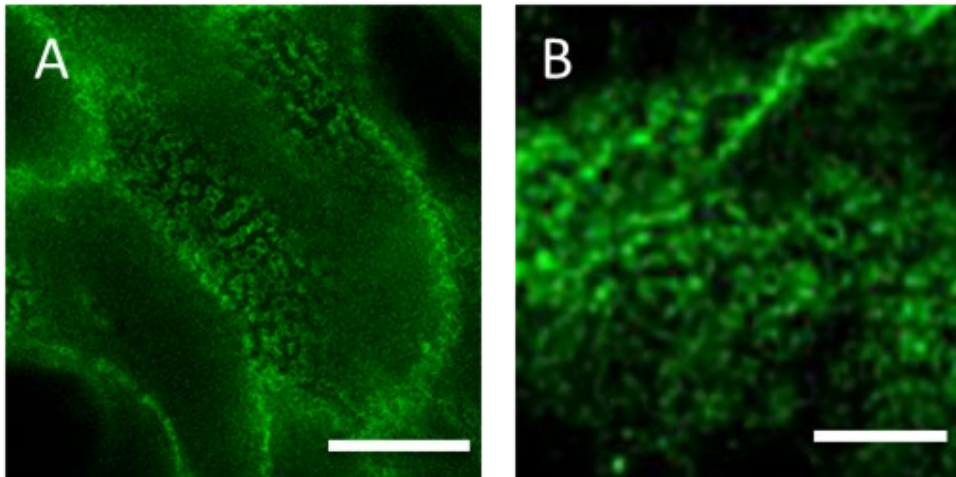

197 *Figure 5: Possible uniform nanostructure for intercellular junctions. A) STED image of desmoglein in human*  
198 *epidermis. Image shows clear ring structure along the cellular membrane on the extracellular surface of the*  
199 *keratinocytes. Scalebar is 2  $\mu\text{m}$ . B) STED image of zonula occludens 1 (ZO1) in mouse epidermis. Image reveals*  
200 *clear ring structures along the cellular membrane of the keratinocytes. Scalebar is 1  $\mu\text{m}$ . Both observations*  
201 *strengthen the theory of a uniform structure for intercellular junctions.*

202

203 Both the observed labeling pattern and the ring structure could explain the varied  
204 desmosomal sizes reported in literature. The absence of labeling in the middle could be interpreted as  
205 two individual desmosomes, resulting in smaller diameters.

206 Besides the desmosomes, there are several other intercellular junctions present in the  
207 epidermis. From the literature we know that gap junctions form round pores in the cellular membrane  
208 of neighboring cells, to establish a route of communication between neighboring cells [25]. Combined  
209 with our observations in the desmosomes, we hypothesize a common ring-like structure for intercellular  
210 junctions. To test the hypothesis, images of the tight junction plaque protein, zonula occludens 1 (ZO1),  
211 were taken. As one can see in Figure 5B, ZO1, just like desmoplakin, forms rings along the inner leaflet  
212 of the cellular membrane. This supports the suggestion of a common nanostructure for intercellular  
213 junctions but must of course be tested further in cadheren junctions as well as hemidesmosomes.

214 In summary, using STED microscopy it was possible to determine that desmosomes form a  
215 tighter structure in the basal layer compared to the suprabasal layers in both human and mouse epidermis.  
216 Whether there is a functional explanation to this conformational change or whether the change in  
217 tightness simply reflects the terminal differentiation program, needs further investigation. The increased  
218 resolution of 3D STED microscopy also revealed a ring-shaped nanostructure for the desmoplakin and

219 desmoglein in the desmosomes, which are seen to coat the cells on all sides. STED images of the tight  
220 junction plaque protein ZO1 displayed similar ring formations, suggesting a common structure for the  
221 intercellular junctions such as desmosomes, tight junction as well as the gap junctions, however the  
222 nanostructure of the remaining junctions would need further investigation.

## 223 **Material and Methods**

### 224 **Antibodies**

225 Antibodies specific for desmoglein (ab16434) and ZO-1 (ab190085) were purchased from Abcam®,  
226 Cambridge, United Kingdom. Antibodies specific for desmoplakin I+II (ABIN452374) were purchased  
227 from antibodies-online.com, Aachen, Germany. Secondary antibodies coupled with STAR488 (rabbit:  
228 2-0022-051-2; mouse: 2-0032-051-9) or STAR440SX (mouse: 2-0022-051-2; rabbit: 2-0032-051-9)  
229 and STAR-RED (Goat Anti Mouse, STRED-1001-500UG) were purchased from Abberior, Göttingen,  
230 Germany. Alexa Fluor 488 (A11055) was acquired from Invitrogen™, Fisher Scientific, Slangerup,  
231 Denmark.

232

### 233 **Skin**

234 Human skin samples were obtained from abdominoplasty and provided by the Department of Plastic  
235 Surgery at Odense University Hospital. where non-colored ethanol iodide was used for disinfection.  
236 Samples were stored at 4°C until processed, maximum 2h after surgery. The skin was cut into 0.5-1  
237 thick 1 cm<sup>2</sup> sections, washed in tap water before patted dry. Immediately afterwards the skin sections  
238 were coated in O.C.T compound (VWR, Søborg, Denmark) and frozen at -120°C in 2-methylbutan  
239 cooled with liquid nitrogen and stored at -80°C until use. According to Danish regulations human tissue  
240 remnants from surgery are regarded as waste products and hence do not require written informed consent  
241 from the patient. Any work involving human samples was performed in accordance with the Declaration  
242 of Helsinki Principles (2008).

243 The WT mice used in this study were provided by Thomas Magin and his group in Leipzig. Mice fetuses  
244 were removed by caesarean section on embryonic day 18.5. The mice were euthanized and frozen at -  
245 120°C in 2-methylbutan cooled by liquid nitrogen. The samples were then send to us on dry ice and  
246 stored at -80°C until use.

247

## 248 **Labeling**

249 Histological sections of 15  $\mu\text{m}$  thickness were cut on the Cryotome FSE cryostat (Thermo Scientific,  
250 USA) and transferred to coverslips pre-coated with poly-L-lysine solution (1%) in  $\text{H}_2\text{O}$  (Sigma-Aldrich,  
251 Copenhagen, Denmark). The tissue sections were fixed in  $-20^\circ\text{C}$  methanol for ten minutes followed  
252 by a blocking cycle (5x3 min) using phosphate buffered saline containing 1% bovine serum albumin  
253 (Sigma-Aldrich, Copenhagen, Denmark). The samples were then incubated overnight at  $4^\circ\text{C}$  with the  
254 primary antibodies (dilution factor: Desmoplakin I+II 1:200, Desmoglein 1 1:500, ZO1 1:100). After  
255 incubation the sections were subjected to another rinse cycle (5x3 min) with phosphate buffered saline  
256 containing 1% bovine serum albumin and subsequently incubated overnight at  $4^\circ\text{C}$  with the secondary  
257 antibodies. All samples were mounted on SuperFrost Plus microscope slides (Thermo Scientific, USA)  
258 using ProLong Diamond Antifade Mountant (Thermo Fisher, Hvidovre, Denmark)

## 259 **Imaging**

260 Confocal and STED images of samples with STAR440SX, STAR488 and Alexa488 were obtained  
261 using a Leica TCS SP8 (Manheim, Germany) inverted stage microscope fitted with a Leica STED  
262 module (592 nm continuous wave depletion laser). Emission was recorded using a gated hybrid detector  
263 (0.3 ns.). The software used for controlling the setup of the microscope was Leica Application Suite X  
264 (LAS X). 3D-STED images of samples with STAR-RED, image acquisition was carried out on an  
265 Abberior Facility Line STED microscope using a 100x magnification UplanSApo 1.4 NA oil  
266 immersion objective lens. Imaging of Abberior STAR RED was done using a pulsed excitation  
267 laser of 640 nm and a pulsed 775 nm depletion laser was used. Fluorescence was detected by  
268 spectral detectors between 650-763 nm with a time gating delay of 750 ps for an interval of 8  
269 ns. Post-processing of the images was done using the deconvolution software: SVI Huygens  
270 Professional (Hilversum, The Netherlands) and further optimization and analyzing of the images were  
271 done using FIJI [31].

272 **Conflict of interest statement:** The authors state no conflict of interest.

## 273 **Acknowledgements**

274 We thank Jamal-Eddine Bouameur and Thomas Magin at Leipzig University for providing the mice  
275 used in this study and Jens Ahm Sørensen, University Hospital Odense, for providing the human  
276 epidermis.

277 We also acknowledge the Danish Molecular Biomedical Imaging Center (DaMBIC, University of  
278 Southern Denmark), supported by the Novo Nordisk Foundation (NNF) (grant agreement number  
279 NNF18SA0032928), for the use of the bioimaging facilities.

## 280 References

- 281 1. Franke, W.W., *Discovering the molecular components of intercellular junctions--a*  
282 *historical view*. Cold Spring Harb Perspect Biol, 2009. **1**(3): p. a003061.
- 283 2. Kowalczyk, A.P. and K.J. Green, *Structure, function, and regulation of desmosomes*.  
284 Prog Mol Biol Transl Sci, 2013. **116**: p. 95-118.
- 285 3. Berika, M. and D. Garrod, *Desmosomal adhesion in vivo*. Cell Commun Adhes, 2014.  
286 **21**(1): p. 65-75.
- 287 4. Bornslaeger, E.A., et al., *Breaking the connection: displacement of the desmosomal*  
288 *plaque protein desmoplakin from cell-cell interfaces disrupts anchorage of*  
289 *intermediate filament bundles and alters intercellular junction assembly*. J Cell Biol,  
290 1996. **134**(4): p. 985-1001.
- 291 5. Stanley, J.R. and M. Amagai, *Pemphigus, bullous impetigo, and the staphylococcal*  
292 *scalded-skin syndrome*. N Engl J Med, 2006. **355**(17): p. 1800-10.
- 293 6. Delva, E., D.K. Tucker, and A.P. Kowalczyk, *The desmosome*. Cold Spring Harb  
294 Perspect Biol, 2009. **1**(2): p. a002543.
- 295 7. Bar, J., et al., *Skin fragility and impaired desmosomal adhesion in mice lacking all*  
296 *keratins*. J Invest Dermatol, 2014. **134**(4): p. 1012-1022.
- 297 8. Schrön, O., *Beitrag z. Kenntniss der Anatomie und Physiologie des Eierstocks der*  
298 *Säugethiere. v. Siebold's und Kölliker's Zeitschrift für wissenschaftl. Zoologie*. Bd.  
299 XII, 1863.
- 300 9. Bizzozero, G., *Sulla struttura degli epiteli pavimentosi stratificati*. Rend. R. Ist.  
301 Lombardo, 1870. **3**: p. 675.
- 302 10. Odland, G.F., *The fine structure of the interrelationship of cells in the human*  
303 *epidermis*. J Biophys Biochem Cytol, 1958. **4**(5): p. 529-38.
- 304 11. Hibbs, R.G. and W.H. Clark, Jr., *Electron microscope studies of the human epidermis;*  
305 *the cell boundaries and topography of the stratum malpighii*. J Biophys Biochem  
306 Cytol, 1959. **6**(1): p. 71-6.
- 307 12. Farquhar, M.G. and G.E. Palade, *Junctional complexes in various epithelia*. J Cell  
308 Biol, 1963. **17**: p. 375-412.
- 309 13. Stahley, S.N., et al., *Molecular organization of the desmosome as revealed by direct*  
310 *stochastic optical reconstruction microscopy*. J Cell Sci, 2016. **129**(15): p. 2897-904.
- 311 14. Boddé, H.E., et al., *Visualization of in vitro percutaneous penetration of mercuric*  
312 *chloride; transport through intercellular space versus cellular uptake through*  
313 *desmosomes*. Journal of Controlled Release, 1991. **15**(3): p. 227-236.
- 314 15. McGrath, J.A., *Hereditary diseases of desmosomes*. Journal of Dermatological  
315 Science, 1999. **20**(2): p. 85-91.
- 316 16. Cichon, C., et al., *MicroRNAs regulate tight junction proteins and modulate*  
317 *epithelial/endothelial barrier functions*. Tissue Barriers, 2014. **2**.

- 318 17. Gutstein, D.E., et al., *The organization of adherens junctions and desmosomes at the*  
319 *cardiac intercalated disc is independent of gap junctions*. Journal of Cell Science,  
320 2003. **116**(5): p. 875-885.
- 321 18. Rust, M.J., M. Bates, and X.W. Zhuang, *Sub-diffraction-limit imaging by stochastic*  
322 *optical reconstruction microscopy (STORM)*. Nature Methods, 2006. **3**(10): p. 793-  
323 795.
- 324 19. Lau, L., et al., *STED Super-resolution Microscopy in Drosophila Tissue and in*  
325 *Mammalian Cells*. Proc SPIE Int Soc Opt Eng, 2011. **7910**.
- 326 20. Urban, N.T., et al., *STED nanoscopy of actin dynamics in synapses deep inside living*  
327 *brain slices*. Biophys J, 2011. **101**(5): p. 1277-84.
- 328 21. Iachina, I., et al., *The nanoscopic molecular pathway through human skin*. Biochim  
329 Biophys Acta Gen Subj, 2019. **1863**(7): p. 1226-1233.
- 330 22. Dreier, J., J.A. Sorensen, and J.R. Brewer, *Superresolution and Fluorescence*  
331 *Dynamics Evidence Reveal That Intact Liposomes Do Not Cross the Human Skin*  
332 *Barrier*. PLoS One, 2016. **11**(1): p. e0146514.
- 333 23. Beggs, R.R., W.F. Dean, and A.L. Mattheyses, *dSTORM Imaging and Analysis of*  
334 *Desmosome Architecture*, in *Permeability Barrier: Methods and Protocols*, K.  
335 Turksen, Editor. 2021, Springer US: New York, NY. p. 305-315.
- 336 24. Stahley, S.N., et al., *Super-Resolution Microscopy Reveals Altered Desmosomal*  
337 *Protein Organization in Tissue from Patients with Pemphigus Vulgaris*. J Invest  
338 Dermatol, 2016. **136**(1): p. 59-66.
- 339 25. Simpson, C.L., D.M. Patel, and K.J. Green, *Deconstructing the skin: cytoarchitectural*  
340 *determinants of epidermal morphogenesis*. Nat Rev Mol Cell Biol, 2011. **12**(9): p.  
341 565-80.
- 342 26. Celli, A., et al., *Endoplasmic Reticulum Calcium Regulates Epidermal Barrier*  
343 *Response and Desmosomal Structure*. Journal of Investigative Dermatology, 2016.  
344 **136**(9): p. 1840-1847.
- 345 27. Schäfer, S., P.J. Koch, and W.W. Franke, *Identification of the Ubiquitous Human*  
346 *Desmoglein, Dsg2, and the Expression Catalogue of the Desmoglein Subfamily of*  
347 *Desmosomal Cadherins*. Experimental Cell Research, 1994. **211**(2): p. 391-399.
- 348 28. King, I.A., T.J. O'Brien, and R.S. Buxton, *Expression of the "Skin-Type" Desmosomal*  
349 *Cadherin DSC1 Is Closely Linked to the Keratinization of Epithelial Tissues During*  
350 *Mouse Development*. Journal of Investigative Dermatology, 1996. **107**(4): p. 531-538.
- 351 29. Selby, C.C., *An electron microscope study of the epidermis of mammalian skin in thin*  
352 *sections. I. Dermo-epidermal junction and basal cell layer*. J Biophys Biochem Cytol,  
353 1955. **1**(5): p. 429-44.
- 354 30. Bates, I.R., P.W. Wiseman, and J.W. Hanrahan, *Investigating membrane protein*  
355 *dynamics in living cells*. Biochem Cell Biol, 2006. **84**(6): p. 825-31.
- 356 31. Schindelin, J., et al., *Fiji: an open-source platform for biological-image analysis*. Nat  
357 Methods, 2012. **9**(7): p. 676-82.
- 358
